# Supplementary material
Source: MDPI journal article supplement (https://www.mdpi.com/2073-4352/11/7/820)
Supplement: s1 [file s1 › crystals-1304217-supplementary.pdf]

## Supplementary Materials

# Molecular Characterization of the Native (Non-Linked) CD160–HVEM Protein Complex Revealed by Initial Crystallographic Analysis

Simona Lenhartová<sup>1</sup>, Marek Nemčovič<sup>2</sup>, Radka Šebová<sup>1</sup>, Mário Benko<sup>1</sup>, Dirk M. Zajonc<sup>3,4</sup> and Ivana Nemčovičová<sup>1,\*</sup>

<sup>1</sup> Biomedical Research Center, Slovak Academy of Sciences, Dúbravská cesta 9, Bratislava 84505, Slovakia; virusims@savba.sk (S.L.); virurama@savba.sk (R.Š.); virubenq@savba.sk (M.B.)

<sup>2</sup> Institute of Chemistry, Slovak Academy of Sciences, Dúbravská cesta 9, Bratislava 84538, Slovakia; chemnem@savba.sk

<sup>3</sup> Division of Immune Regulation, La Jolla Institute for Immunology, 9420 Athena Circle, La Jolla, CA 92037, USA; dirk.zajonc@pfizer.com

<sup>4</sup> Current affiliation: Cancer Immunology Discovery, Pfizer Inc., 10777 Science Center Dr., San Diego, CA 92121, USA

\* Correspondence: viruivka@savba.sk

**Citation:** Lenhartová, S.; Nemčovič, M.; Šebová, R.; Benko, M.; Zajonc, D.M.; Nemčovičová, I. Molecular Characterization of the Native (Non-Linked) CD160–HVEM Protein Complex Revealed by Initial Crystallographic Analysis. *Crystals* **2021**, *11*, 820.  
<https://doi.org/10.3390/cryst11070820>

Academic Editor(s): Ivana Kutá Smatanová; Pavlína Maloy Řezáčová

Received: 1 July 2021  
Accepted: 12 July 2021  
Published: 15 July 2021

**Publisher's Note:** MDPI stays neutral with regard to jurisdictional claims in published maps and institutional affiliations.

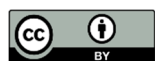

**Copyright:** © 2021 by the authors. Submitted for possible open access publication under the terms and conditions of the Creative Commons Attribution (CC BY) license (<http://creativecommons.org/licenses/by/4.0/>).

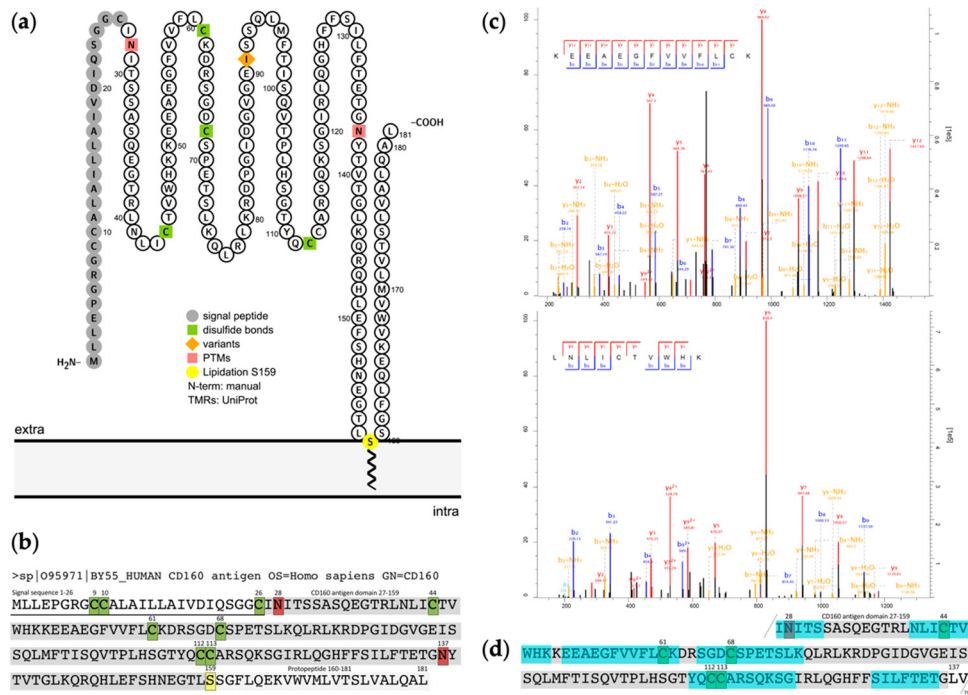

**Figure S1.** CD160 peptide identification by mass spectrometry. Secondary structural elements are highlighted within the amino acid sequence of CD160 (a) visualized by Protter [20] (an open-source tool for interactive integration and visualization of annotated and predicted protein sequence features together with experimental proteomic evidence). CD160 protein sequence generated by UniProt analysis (b) deduced from the cDNA sequence. The positions of the confirmed N-glycosylation sites (red), cysteine residues (green) and lipidation (yellow) are indicated with the same color code (a,b,d). Two representative peptides of the amino acid sequence analyses by tandem mass spectrometry of the purified CD160 trimer are shown (c). All identified peptides within the CD160 sequence are highlighted in cyan (d).
